# Supplementary material for: Tracing the Impact Pathways of COVID-19 on Tourism and Developing Strategies for Resilience and Adaptation in Iran
Source: MDPI journal article supplement (doi:10.3390/su14095508), 2022-05-04
Supplement: s1 [file s1]

Archive with 1 entries (1 files):
- sustainability-1677034-supplementary.pdf
