# Supplementary material for: Tracing the Impact Pathways of COVID-19 on Tourism and Developing Strategies for Resilience and Adaptation in Iran
Source: MDPI journal article supplement (doi:10.3390/su14095508), 2022-05-04
Supplement: s1 [file s1 › sustainability-1677034-supplementary.pdf]

# Supplementary file for: Tracing the Impact Pathways of Covid-19 on Tourism and Strategies for Resilience and Adaptation in Iran

Parvaneh Sobhani <sup>1</sup>, Hadi Veisi <sup>2</sup>, Hassan Esmaeilzadeh <sup>1,\*</sup>, Seyed Mohammad Moein Sadeghi <sup>3</sup>, Marina Viorela Marcu <sup>3</sup>, and Isabelle D. Wolf <sup>4,5</sup>

<sup>1</sup> Environmental Sciences Research Institute, Shahid Beheshti University, Evin, Tehran 1983969411, Iran; p\_sobhanipajoh@sbu.ac.ir (P.S.)

<sup>2</sup> Department of Agroecology, Environmental Sciences Research Institute, Shahid Beheshti University, Evin, Tehran 1983969411, Iran; h\_veisi@sbu.ac.ir

<sup>3</sup> Department of Forest Engineering, Forest Management Planning and Terrestrial Measurements, Faculty of Silviculture and Forest Engineering, Transilvania University of Brasov, Șirul Beethoven 1, 500123 Brasov, Romania; seyed.sadeghi@unitb.ro (S.M.M.S.); viorela.marcu@unitbv.ro (M.V.M.)

<sup>4</sup> Australian Centre for Culture, Environment, Society and Space, School of Geography and Sustainable Communities, University of Wollongong, Wollongong, NSW, 2522, Australia; iwolf@uow.edu.au

<sup>5</sup> Centre for Ecosystem Science, University of New South Wales, Sydney, NSW, 2052, Australia

\* Correspondence: H\_esmaeilzadeh@sbu.ac.ir (H.E.)

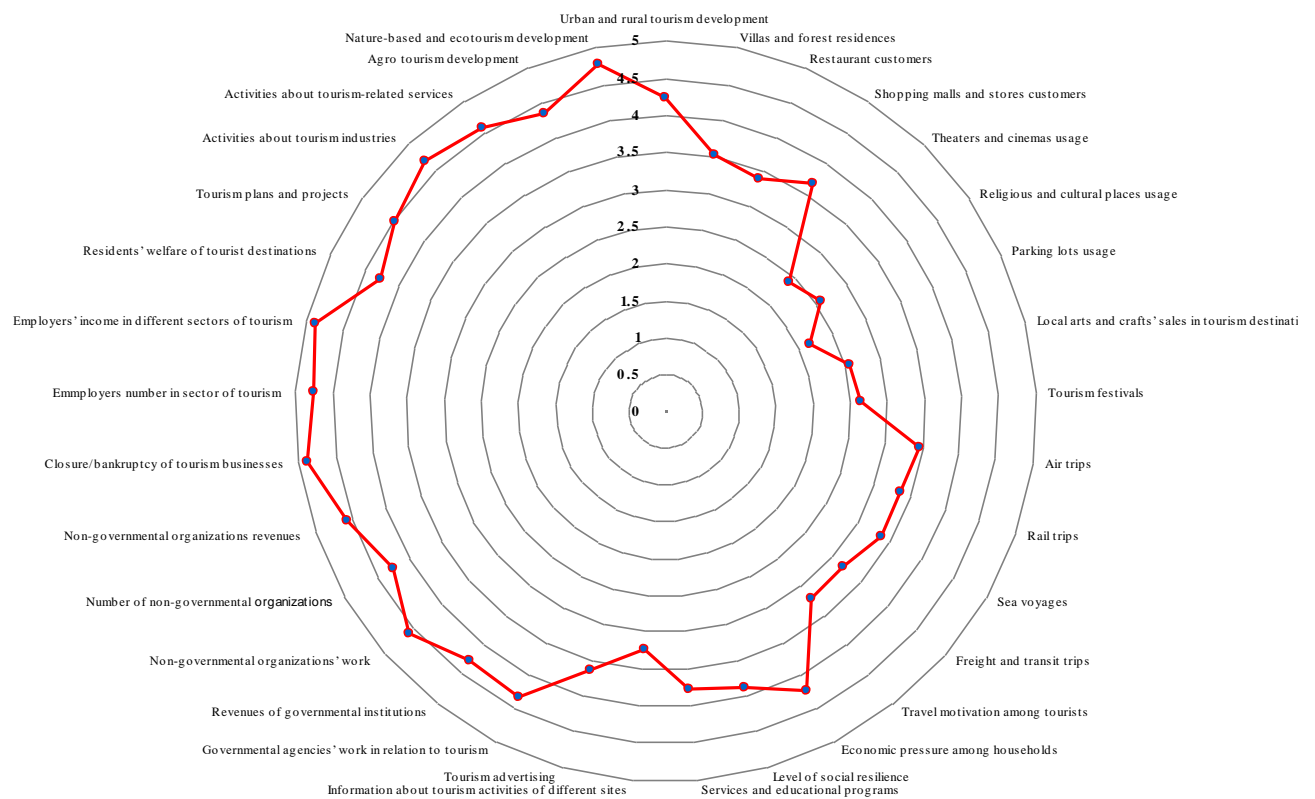

**Figure S1.** Negative impacts of CV-19 on tourism in Iran.

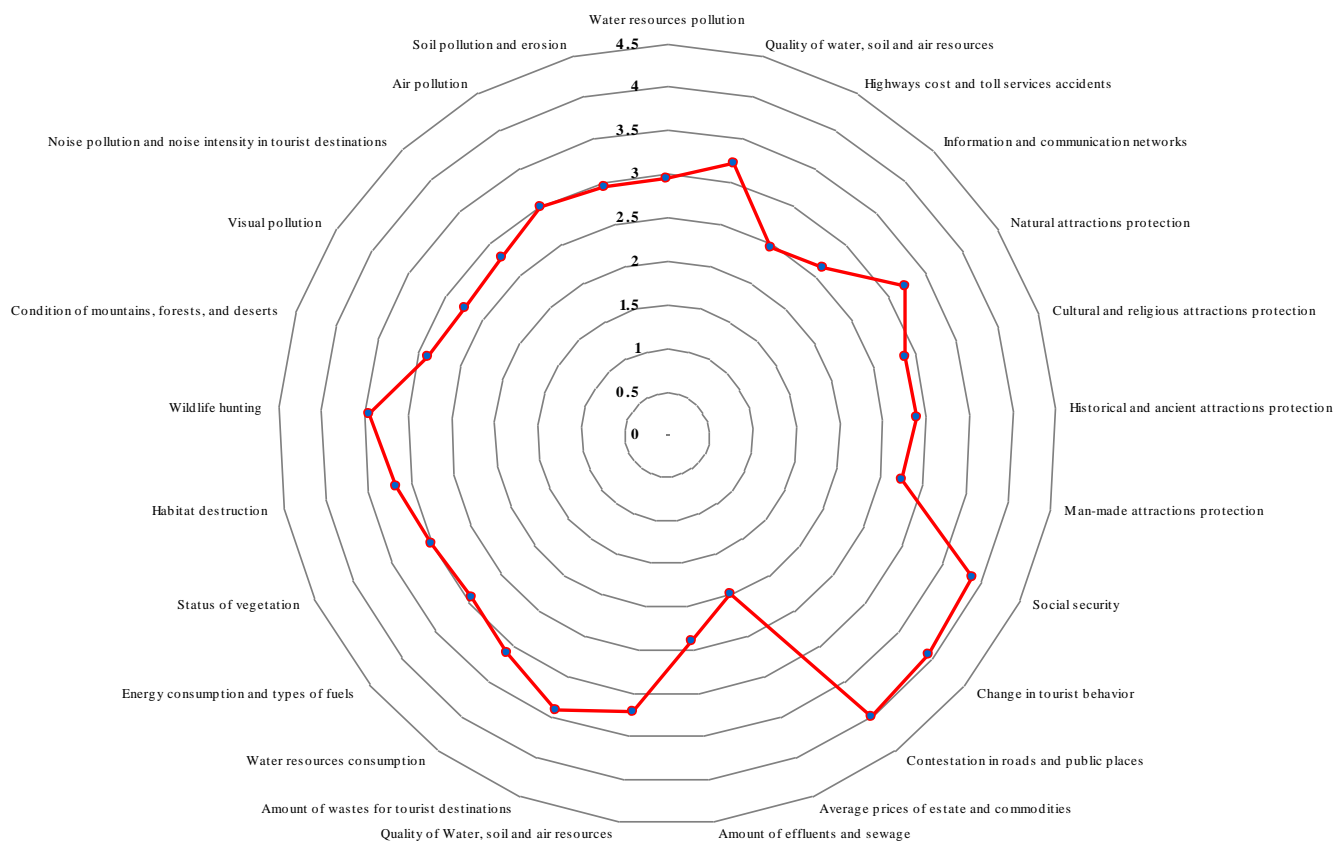

**Figure S2.** Positive impacts of CV-19 on tourism in Iran.
